# Supplementary material for: External validation of the RISC, RISC-Malawi, and PERCH clinical prediction rules to identify risk of death in children hospitalized with pneumonia
Source: PubMed Central journal article supplement (PMC8542381; doi:10.7189/jogh.11.04062), 2021-10-09
Supplement: jogh-11-04062-s001.pdf [file jogh-11-04062-s001.pdf]

## Online Supplementary Document

**Table S1.** Number of patients, deaths, case fatality ratio, sensitivity, specificity, correctly classified, positive likelihood ratio (LR+) and negative likelihood ratio (LR-) for Respiratory Index of Severity in Children (RISC) score for HIV-negative children **0-24 months old** in the Pneumonia REsearch Partnerships to Assess WHO REcommendations (PREPARE) dataset (n=3,574)

| Score | Patients, n | Deaths, n | Case fatality ratio % <sup>a</sup> | Correctly classified % <sup>b</sup> | Sensitivity <sup>b</sup> | Specificity <sup>b</sup> | LR+ (95% Confidence Interval) <sup>b</sup> | LR- (95% Confidence Interval) <sup>b</sup> |
|-------|-------------|-----------|------------------------------------|-------------------------------------|--------------------------|--------------------------|--------------------------------------------|--------------------------------------------|
| -2    | 73          | 2         | 2.7                                | 1.7                                 | 100.0%                   | 0.0%                     | 1.00 (--)                                  |                                            |
| -1    | 15          | 1         | 6.7                                | 3.6                                 | 96.7%                    | 2.0%                     | 0.99 (0.94-1.03)                           | 1.32 (0.41-6.46)                           |
| 0     | 862         | 7         | 0.8                                | 4.0                                 | 94.1%                    | 2.4%                     | 0.98 (0.92-1.03)                           | 1.65 (0.66-6.25)                           |
| 1     | 521         | 7         | 1.3                                | 27.7                                | 81.6%                    | 26.8%                    | 1.16 (1.02-1.28)                           | 0.59 (0.35-1.08)                           |
| 2     | 1,231       | 10        | 0.8                                | 41.9                                | 74.1%                    | 41.4%                    | 1.26 (1.05-1.44)                           | 0.64 (0.45-1.01)                           |
| 3     | 551         | 16        | 2.9                                | 75.8                                | 55.7%                    | 76.1%                    | 2.36 (1.85-2.94)                           | 0.57 (0.44-0.77)                           |
| 4     | 241         | 13        | 5.4                                | 90.3                                | 29.5%                    | 91.4%                    | 3.64 (2.29-5.12)                           | 0.77 (0.66-0.91)                           |
| 5     | 70          | 4         | 5.7                                | 96.3                                | 8.2%                     | 97.9%                    | 4.16 (1.61-9.16)                           | 0.93 (0.87-1.01)                           |
| 6     | 10          | 1         | 10.0                               | 98.1                                | 1.6%                     | 99.7%                    | 5.96 (0.82-49.7)                           | 0.99 (0.95-1.02)                           |

**Area under receiver operating curve: 0.66 (95% Confidence Interval 0.58-0.73)**

<sup>a</sup> Calculated at each respective score.

<sup>b</sup> Calculated at  $\geq$  each respective score.

**Table S2.** Number of patients, deaths, and case fatality ratio of parameters used in the Respiratory Index of Severity in Children (RISC) score for HIV-negative children expanded to children **0-59 months old** in the Pneumonia REsearch Partnerships to Assess WHO REcommendations (PREPARE) dataset (n=4,061)

| <b>Parameter</b>                                            | <b>Sign or symptom present, n (%)</b> | <b>Deaths, n</b> | <b>Case fatality ratio % (95% CI)</b> |
|-------------------------------------------------------------|---------------------------------------|------------------|---------------------------------------|
| Oxygen saturation (SpO <sub>2</sub> ) ≤ 90%                 | 988 (24.3)                            | 27               | 2.7 (1.8-3.9)                         |
| Chest indrawing (with SpO <sub>2</sub> >90%)                | 2,698 (66.4)                          | 31               | 1.1 (0.8-1.6)                         |
| Wheezing                                                    | 1,677 (41.3)                          | 21               | 1.2 (0.8-1.9)                         |
| Refusal to feed                                             | 393 (9.7)                             | 20               | 5.1 (3.1-7.7)                         |
| World Health Organization (WHO) weight for age z-score ≤ -3 | 328 (8.1)                             | 16               | 4.9 (2.8-7.8)                         |
| WHO weight for age z-score -2 ≤ z < -3                      | 522 (12.8)                            | 13               | 2.5 (1.3-4.2)                         |

**Table S3.** Number of patients, deaths, case fatality ratio, sensitivity, specificity, correctly classified, positive likelihood ratio (LR+) and negative likelihood ratio (LR-) for Respiratory Index of Severity in Children (RISC) score for HIV-negative children expanded to children **0-59 months old** in the Pneumonia REsearch Partnerships to Assess WHO REcommendations (PREPARE) dataset (n=4,061)

| Score | Patients, n | Deaths, n | Case fatality ratio % <sup>a</sup> | Correctly classified % <sup>b</sup> | Sensitivity <sup>b</sup> | Specificity <sup>b</sup> | LR+ (95% Confidence Interval) <sup>b</sup> | LR- (95% Confidence Interval) <sup>b</sup> |
|-------|-------------|-----------|------------------------------------|-------------------------------------|--------------------------|--------------------------|--------------------------------------------|--------------------------------------------|
| -2    | 92          | 2         | 2.2                                | 1.6                                 | 100.0%                   | 0.0%                     | 1.00                                       |                                            |
| -1    | 19          | 1         | 5.3                                | 3.8                                 | 97.0%                    | 2.2%                     | 0.99 (0.95-1.04)                           | 1.32 (0.33-5.27)                           |
| 0     | 1,008       | 8         | 0.8                                | 4.2                                 | 95.5%                    | 2.7%                     | 0.98 (0.93-1.03)                           | 1.66 (0.54-5.08)                           |
| 1     | 570         | 7         | 1.2                                | 28.7                                | 83.6%                    | 27.7%                    | 1.16 (1.04-1.29)                           | 0.59 (0.34-1.02)                           |
| 2     | 1,374       | 11        | 0.8                                | 42.3                                | 73.1%                    | 41.8%                    | 1.26 (1.08-1.46)                           | 0.64 (0.43-0.95)                           |
| 3     | 633         | 17        | 2.7                                | 75.6                                | 56.7%                    | 76.0%                    | 2.36 (1.90-2.93)                           | 0.57 (0.43-0.75)                           |
| 4     | 273         | 15        | 5.5                                | 90.4                                | 31.3%                    | 91.4%                    | 3.64 (2.52-5.26)                           | 0.75 (0.64-0.88)                           |
| 5     | 81          | 5         | 6.2                                | 96.4                                | 9.0%                     | 97.8%                    | 4.16 (1.88-9.18)                           | 0.93 (0.86-1.00)                           |
| 6     | 11          | 1         | 9.1                                | 98.1                                | 1.5%                     | 99.7%                    | 5.96 (0.77-45.9)                           | 0.99 (0.96-1.02)                           |

**Area under receiver operating curve: 0.66 (95% Confidence Interval: 0.59-0.74)**

<sup>a</sup> Calculated at each respective score.

<sup>b</sup> Calculated at  $\geq$  each respective score.

**Table S4.** Number of patients, deaths, case fatality ratio, sensitivity, specificity, correctly classified, positive likelihood ratio (LR+), and negative likelihood ratio (LR-) for Respiratory Index of Severity in Children (RISC)-Malawi score with weight-for-age (WAZ) for children 2-59 months old in the PREPARE dataset (n=17,864)

| Score | Patients, n | Deaths, n | Case fatality ratio % <sup>a</sup> | Correctly classified % <sup>b</sup> | Sensitivity <sup>b</sup> | Specificity <sup>b</sup> | LR+ (95% Confidence Interval) <sup>b</sup> | LR- (95% Confidence Interval) <sup>b</sup> |
|-------|-------------|-----------|------------------------------------|-------------------------------------|--------------------------|--------------------------|--------------------------------------------|--------------------------------------------|
| -1    | 1,102       | 12        | 1.1                                | 4.9                                 | 100.0%                   | 0.0%                     | 1.00                                       | --                                         |
| 0     | 3,664       | 45        | 1.2                                | 10.9                                | 98.6%                    | 6.4%                     | 1.05 (1.04-1.06)                           | 0.21 (0.12-0.38)                           |
| 1     | 3,563       | 54        | 1.5                                | 30.9                                | 93.4%                    | 27.7%                    | 1.29 (1.27-1.32)                           | 0.24 (0.18-0.30)                           |
| 2     | 1,107       | 34        | 3.1                                | 50.2                                | 87.2%                    | 48.4%                    | 1.69 (1.64-1.74)                           | 0.26 (0.22-0.31)                           |
| 3     | 964         | 27        | 2.8                                | 56.1                                | 83.3%                    | 54.7%                    | 1.84 (1.78-1.90)                           | 0.30 (0.26-0.35)                           |
| 4     | 1,181       | 44        | 3.7                                | 61.2                                | 80.2%                    | 60.2%                    | 2.01 (1.94-2.09)                           | 0.33 (0.29-0.38)                           |
| 5     | 1,582       | 118       | 7.5                                | 67.3                                | 75.1%                    | 67.9%                    | 2.27 (2.17-2.37)                           | 0.37 (0.33-0.42)                           |
| 6     | 1,768       | 158       | 8.9                                | 74.8                                | 61.6%                    | 75.5%                    | 2.51 (2.37-2.66)                           | 0.51 (0.47-0.55)                           |
| 7     | 775         | 58        | 7.5                                | 82.9                                | 43.4%                    | 85.0%                    | 2.88 (2.65-3.14)                           | 0.67 (0.63-0.71)                           |
| 8     | 632         | 69        | 10.9                               | 86.6                                | 36.7%                    | 89.2%                    | 3.39 (3.08-3.74)                           | 0.71 (0.67-0.75)                           |
| 9     | 345         | 50        | 14.5                               | 89.4                                | 28.8%                    | 92.5%                    | 3.83 (3.41-4.31)                           | 0.77 (0.74-0.80)                           |
| 10    | 258         | 36        | 14.0                               | 90.8                                | 23.0%                    | 94.2%                    | 3.99 (3.48-4.57)                           | 0.82 (0.79-0.85)                           |
| 11    | 527         | 90        | 17.1                               | 91.8                                | 18.9%                    | 95.5%                    | 4.23 (3.62-4.93)                           | 0.85 (0.82-0.88)                           |
| 12    | 284         | 43        | 15.1                               | 93.7                                | 8.5%                     | 98.1%                    | 4.49 (3.52-5.73)                           | 0.93 (0.91-0.95)                           |
| 13    | 38          | 9         | 23.7                               | 94.9                                | 3.6%                     | 99.5%                    | 7.48 (4.98-11.30)                          | 0.97 (0.96-0.98)                           |
| 14    | 14          | 5         | 35.7                               | 95.0                                | 2.5%                     | 99.7%                    | 8.27 (5.05-13.60)                          | 0.98 (0.97-0.99)                           |
| 15    | 15          | 3         | 20.0                               | 95.0                                | 2.0%                     | 99.7%                    | 7.73 (4.43-13.50)                          | 0.98 (0.97-0.99)                           |
| 16    | 32          | 11        | 34.4                               | 95.0                                | 1.6%                     | 99.8%                    | 8.83 (4.72-16.50)                          | 0.99 (0.98-0.99)                           |
| 17    | 13          | 3         | 23.1                               | 95.1                                | 0.3%                     | 99.9%                    | 5.87 (1.62-21.30)                          | 1.00 (0.99-1.00)                           |

**Area under receiver operating curve: 0.75 (95% Confidence Interval: 0.74-0.77)**

<sup>a</sup> Calculated at each respective score.

<sup>b</sup> Calculated at  $\geq$  each respective score.

**Table S5.** Number of patients, deaths, and case fatality ratio of parameters used in the Respiratory Index of Severity in Children (RISC)-Malawi (middle upper arm circumference [MUAC]) score for children 2-59 months old in the two datasets in the Pneumonia REsearch Partnerships to Assess WHO REcommendations (PREPARE) dataset that included all 5 parameters (n=2,251)

| Parameter                                  | Weighted score | Patients, n  | Deaths, n | Case fatality ratio % (95% Confidence Interval) |
|--------------------------------------------|----------------|--------------|-----------|-------------------------------------------------|
| <b>Oxygen saturation (SpO<sub>2</sub>)</b> |                |              |           |                                                 |
| SpO <sub>2</sub> >93%                      | 0              | 1,440 (64.0) | 66        | 4.6 (3.6-5.8)                                   |
| SpO <sub>2</sub> 90-92%                    | 2              | 407 (18.1)   | 26        | 6.4 (4.2-9.2)                                   |
| SpO <sub>2</sub> <90%                      | 7              | 404 (17.9)   | 59        | 14.6 (11.3-18.4)                                |
| <b>MUAC</b>                                |                |              |           |                                                 |
| MUAC >13.5 cm                              | 0              | 626 (27.8)   | 19        | 3.0 (1.8-4.7)                                   |
| MUAC 11.5-13.5 cm                          | 3              | 1,093 (48.5) | 67        | 6.1 (4.8-7.7)                                   |
| MUAC <11.5 cm                              | 7              | 532 (23.6)   | 65        | 12.2 (9.6-15.3)                                 |
| <b>Female</b>                              | 1              | 781 (34.7)   | 52        | 6.7 (5.0-8.6)                                   |
| <b>Wheezing</b>                            | -2             | 1,064 (47.3) | 50        | 4.7 (3.5-6.1)                                   |
| <b>Unconscious/decreased consciousness</b> | 8              | 134 (5.9)    | 9         | 6.7 (3.1-12.4)                                  |

**Table S6.** Application of the Respiratory Index of Severity in Children (RISC)-Malawi (MUAC) score to children 2-59 months of age in studies including all 5 parameters in the Pneumonia REsearch Partnerships to Assess WHO REcommendations (PREPARE) dataset (n=2,251)

| Score | Patients, n | Deaths, n | Case fatality ratio % <sup>a</sup> | Correctly classified % <sup>b</sup> | Sensitivity <sup>b</sup> | Specificity <sup>b</sup> | LR+ (95% Confidence Interval) <sup>b</sup> | LR- (95% Confidence Interval) <sup>b</sup> |
|-------|-------------|-----------|------------------------------------|-------------------------------------|--------------------------|--------------------------|--------------------------------------------|--------------------------------------------|
| -2    | 121         | 1         | 0.8                                | 6.7                                 | 100.0%                   | 0.0%                     | 1.00                                       |                                            |
| -1    | 56          | 1         | 1.8                                | 12.0                                | 99.3%                    | 5.7%                     | 1.05 (1.04-1.07)                           | 0.12 (0.02-0.82)                           |
| 0     | 147         | 2         | 1.4                                | 14.4                                | 98.7%                    | 8.3%                     | 1.08 (1.05-1.10)                           | 0.16 (0.04-0.63)                           |
| 1     | 389         | 13        | 3.3                                | 20.7                                | 97.3%                    | 15.2%                    | 1.15 (1.11-1.19)                           | 0.17 (0.07-0.46)                           |
| 2     | 118         | 2         | 1.7                                | 36.9                                | 88.7%                    | 33.1%                    | 1.33 (1.24-1.42)                           | 0.34 (0.22-0.53)                           |
| 3     | 300         | 14        | 4.7                                | 41.9                                | 87.4%                    | 38.7%                    | 1.43 (1.33-1.53)                           | 0.32 (0.21-0.50)                           |
| 4     | 148         | 10        | 6.8                                | 54.0                                | 78.1%                    | 52.3%                    | 1.64 (1.49-1.80)                           | 0.42 (0.31-0.57)                           |
| 5     | 169         | 12        | 7.1                                | 59.7                                | 71.5%                    | 58.9%                    | 1.74 (1.55-1.95)                           | 0.48 (0.37-0.62)                           |
| 6     | 69          | 8         | 11.6                               | 66.1                                | 63.6%                    | 66.3%                    | 1.89 (1.65-2.16)                           | 0.55 (0.44-0.68)                           |
| 7     | 148         | 14        | 9.5                                | 68.5                                | 58.3%                    | 69.2%                    | 1.89 (1.63-2.20)                           | 0.60 (0.50-0.73)                           |
| 8     | 179         | 16        | 8.9                                | 73.8                                | 49.0%                    | 75.6%                    | 2.01 (1.68-2.40)                           | 0.67 (0.58-0.79)                           |
| 9     | 90          | 8         | 8.9                                | 80.4                                | 38.4%                    | 83.4%                    | 2.31 (1.85-2.89)                           | 0.74 (0.65-0.84)                           |
| 10    | 77          | 14        | 18.2                               | 83.6                                | 33.1%                    | 87.3%                    | 2.60 (2.02-3.35)                           | 0.77 (0.68-0.86)                           |
| 11    | 48          | 6         | 12.5                               | 85.8                                | 23.8%                    | 90.3%                    | 2.45 (1.79-3.36)                           | 0.84 (0.77-0.92)                           |
| 12    | 58          | 4         | 6.9                                | 87.4                                | 19.9%                    | 92.3%                    | 2.58 (1.81-3.67)                           | 0.87 (0.80-0.94)                           |
| 13    | 15          | 1         | 6.7                                | 89.6                                | 17.2%                    | 94.9%                    | 3.35 (2.26-4.97)                           | 0.87 (0.81-0.94)                           |
| 14    | 57          | 14        | 24.6                               | 90.2                                | 16.6%                    | 95.5%                    | 3.70 (2.46-5.57)                           | 0.87 (0.81-0.94)                           |
| 15    | 30          | 8         | 26.7                               | 91.5                                | 7.3%                     | 97.6%                    | 3.00 (1.60-5.63)                           | 0.95 (0.91-0.99)                           |
| 16    | 14          | 1         | 7.1                                | 92.1                                | 2.0%                     | 98.6%                    | 1.44 (0.44-4.67)                           | 0.99 (0.97-1.02)                           |
| 18    | 6           | 0         | 0                                  | 92.7                                | 1.3%                     | 99.2%                    | 1.74 (0.40-7.49)                           | 0.99 (0.98-1.01)                           |
| 19    | 7           | 0         | 0                                  | 92.9                                | 1.3%                     | 99.5%                    | 2.78 (0.61-12.6)                           | 0.99 (0.97-1.01)                           |
| 22    | 3           | 2         | 66.7                               | 93.2                                | 1.3%                     | 99.9%                    | 9.27 (1.56-55.1)                           | 0.99 (0.97-1.01)                           |
| 23    | 2           | 0         | 0                                  | 93.2                                | 0.0%                     | 99.9%                    | 0.00 (-)                                   | 1.00 (1.00-1.00)                           |

**Area under receiver operating curve: 0.70 (95% Confidence Interval, 0.66-0.74)**

<sup>a</sup> Calculated at each respective score.

<sup>b</sup> Calculated at  $\geq$  each respective score.

**Table S7.** Number of patients, deaths, case fatality ratio, correctly classified, sensitivity, specificity, positive likelihood ratio (LR+) and negative likelihood ratio (LR-) for Pneumonia Etiology Research for Child Health (PERCH) Score for HIV-negative children **1-59 months old** in the Pneumonia REsearch Partnerships to Assess WHO REcommendations (PREPARE) dataset (n=732)

| Score | Patients, n | Deaths, n | Case fatality ratio % <sup>a</sup> | Correctly classified % <sup>b</sup> | Sensitivity <sup>b</sup> | Specificity <sup>b</sup> | LR+ (95% Confidence Interval) <sup>b</sup> | LR- (95% Confidence Interval) <sup>b</sup> |
|-------|-------------|-----------|------------------------------------|-------------------------------------|--------------------------|--------------------------|--------------------------------------------|--------------------------------------------|
| -1    | 5           | 0         | 0.0                                | 2.2                                 | 100.0%                   | 0.0%                     | --                                         | --                                         |
| 0     | 4           | 0         | 0.0                                | 2.9                                 | 100.0%                   | 0.7%                     | 1.01 (1.00-1.01)                           | --                                         |
| 1     | 27          | 1         | 3.7                                | 3.4                                 | 100.0%                   | 1.3%                     | 1.01 (1.00-1.02)                           | --                                         |
| 2     | 18          | 1         | 5.6                                | 6.8                                 | 93.7%                    | 4.9%                     | 0.99 (0.87-1.12)                           | 1.28 (0.19-8.77)                           |
| 3     | 94          | 2         | 2.1                                | 9.0                                 | 87.5%                    | 7.3%                     | 0.94 (0.78-1.14)                           | 1.72 (0.46-6.46)                           |
| 4     | 70          | 2         | 2.9                                | 21.3                                | 75.0%                    | 20.1%                    | 0.94 (0.71-1.25)                           | 1.24 (0.52-2.94)                           |
| 5     | 172         | 1         | 0.6                                | 30.3                                | 62.5%                    | 29.6%                    | 0.89 (0.61-1.30)                           | 1.27 (0.67-2.41)                           |
| 6     | 123         | 2         | 1.6                                | 53.5                                | 56.2%                    | 53.5%                    | 1.21 (1.78-1.88)                           | 0.82 (0.47-1.43)                           |
| 7     | 93          | 1         | 1.1                                | 69.8                                | 43.7%                    | 70.4%                    | 1.48 (0.84-2.60)                           | 0.80 (0.52-1.23)                           |
| 8     | 73          | 3         | 4.1                                | 82.2                                | 37.5%                    | 83.2%                    | 2.24 (1.16-4.30)                           | 0.75 (0.51-1.10)                           |
| 9     | 26          | 1         | 3.9                                | 91.4                                | 18.7%                    | 93.0%                    | 2.69 (0.93-7.71)                           | 0.87 (0.69-1.11)                           |
| 10    | 18          | 1         | 5.6                                | 94.7                                | 12.5%                    | 96.5%                    | 3.58 (0.93-13.80)                          | 0.91 (0.75-1.09)                           |
| 11    | 6           | 1         | 16.7                               | 96.9                                | 6.2%                     | 98.9%                    | 5.59 (0.74-42.1)                           | 0.95 (0.84-1.08)                           |
| 12    | 3           | 0         | 0.0                                | 97.4                                | 0.0%                     | 99.6%                    | --                                         | 1.00 (1.00-1.01)                           |

**Area under receiver operating curve: 0.55 (95% Confidence Interval, 0.37-0.73)**

<sup>a</sup> Calculated at each respective score.

<sup>b</sup> Calculated at  $\geq$  each respective score.
